# Supplementary material for: Assessment of the effect of an Interactive Dynamic Referral Interface (IDRI) on the quality of referral letters from general practitioners to gastroenterologists: a randomised cross-over vignette trial
Source: PubMed Central journal article supplement — BMJ Open. 2017 Jun 30;7(6):e014636. doi: 10.1136/bmjopen-2016-014636 (PMC5734248; doi:10.1136/bmjopen-2016-014636), 2017-06-30
Supplement: bmjopen-2016-014636supp002.pdf [file bmjopen-2016-014636supp002.pdf]

# Checklist dyspepsia/reflux/ulcus

## Frequency reflux/pain

- Daily
- Several times pr day
- Several times pr week
- 1-4 times pr month

## Duration

- <3 months
- 3-6 months
- >6 months

## Symptoms

- Dysphagia
- GI-bleeding
  - Melena
  - Hematemesis
  - Positive FOBT
- Reflux/heartburn
- Cough
- Sore throat
- Worsening when lying down
- Association with meals
- Nausea/vomiting
- Abdominal pain/discomfort
- Nocturnal reflux symptoms

## B-Symptoms/reduced general condition

- No
- Yes(if weight loss specify size)
  - <5% of body weight the last 6 months
  - >5% of body weight the last 6 months

## Other diseases

- Cardiovascular disease
- Previous ulcer/h.pylori positive
  - Healing of ulcer controlled
  - Treated with PPI
  - H.pylori detected
  - H.pylori eradication completed
- Previous reflux disease
  - Stage I
  - Stage II
  - Stage III
  - Stage IV

## Current/other relevant medication

- Updated list of current medications attached
- No relief from H2-blockers/PPI
- Treatment with ASA/NSAIDs
- Treatment with alendronate
- Treatment with steroids

## Lab-analyses attached

- Hb, ferritin, MCV
- CRP, SR, Leuc(with diff)
- ALAT, ASAT, ALP, GT, bilirubin(conj/unconj), albumine, INR
- Amylase, lipase, fecal elastase
- FOBT
- H.pylori status

## Findings

- Abdomen

Describe:

## Previous upper GI endoscopies

- Time

Describe:

- Findings

Describe:
