# Supplementary figures and images for: Assessment of the effect of an Interactive Dynamic Referral Interface (IDRI) on the quality of referral letters from general practitioners to gastroenterologists: a randomised cross-over vignette trial
Source: PubMed Central journal article supplement — BMJ Open. 2017 Jun 30;7(6):e014636. doi: 10.1136/bmjopen-2016-014636 (PMC5734248; doi:10.1136/bmjopen-2016-014636), 2017-06-30

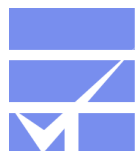

# CONSORT

TRANSPARENT REPORTING of TRIALS

## CONSORT 2010 Flow Diagram

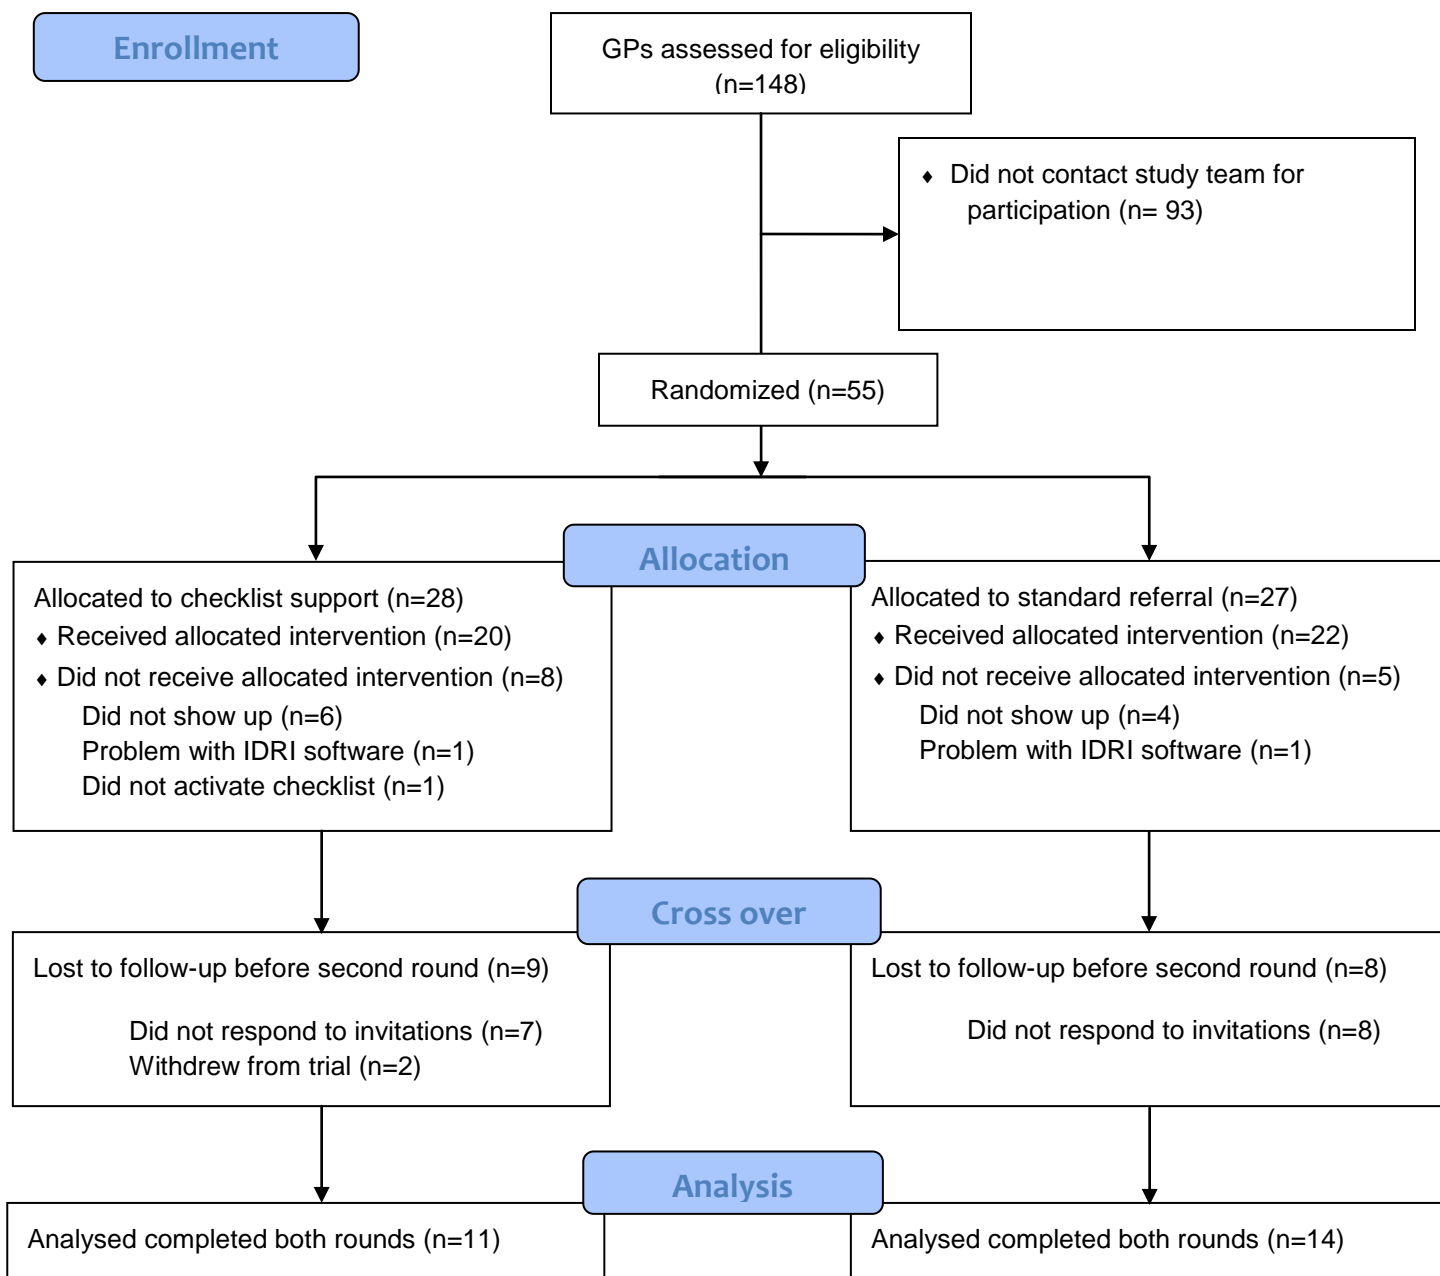

Supplement: bmjopen-2016-014636supp003.pdf [file bmjopen-2016-014636supp003.pdf]
